# Supplementary material for: Engineering the Surface of Ti3C2 MXene Nanosheets for High Stability and Multimodal Anticancer Therapy
Source: MDPI journal article supplement (doi:10.3390/pharmaceutics14020304), 2022-01-27
Supplement: s1 [file s1]

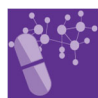

# Supplementary Materials: Engineering the Surface of $\text{Ti}_3\text{C}_2$ MXene Nanosheets for High Stability and Multimodal Anti-cancer Therapy

Chiranjeevi Korupalli, Kai-Long You, Girum Getachew, Akash S. Rasal, Worku Batu Dirersa, Mochamad Zakki Fahmi and Jia-Yaw Chang

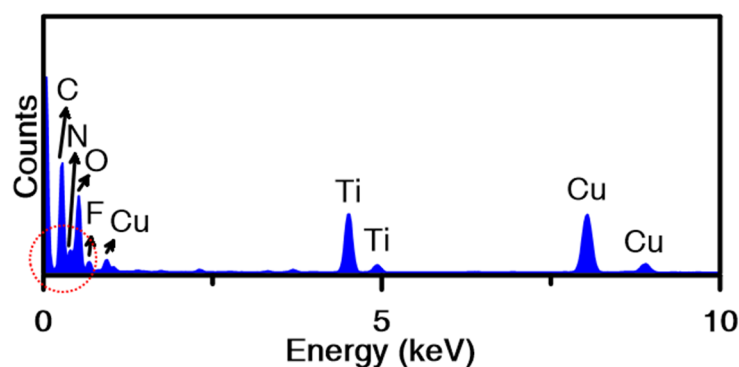

Figure S1. EDS spectrum of CGDSTC NSs.

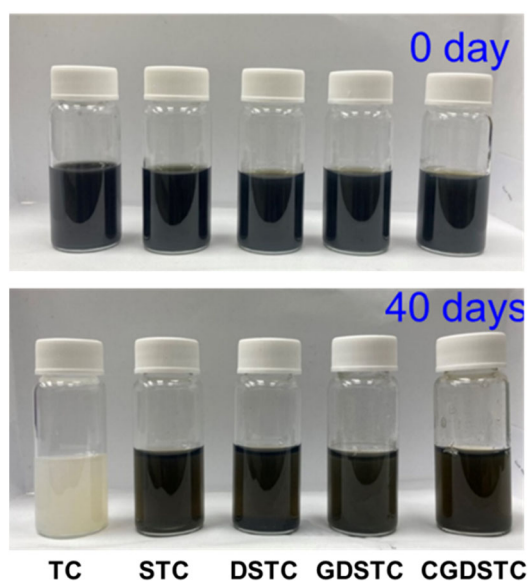

Figure S2. Photographs of solutions after 0 day and 40 days storage.

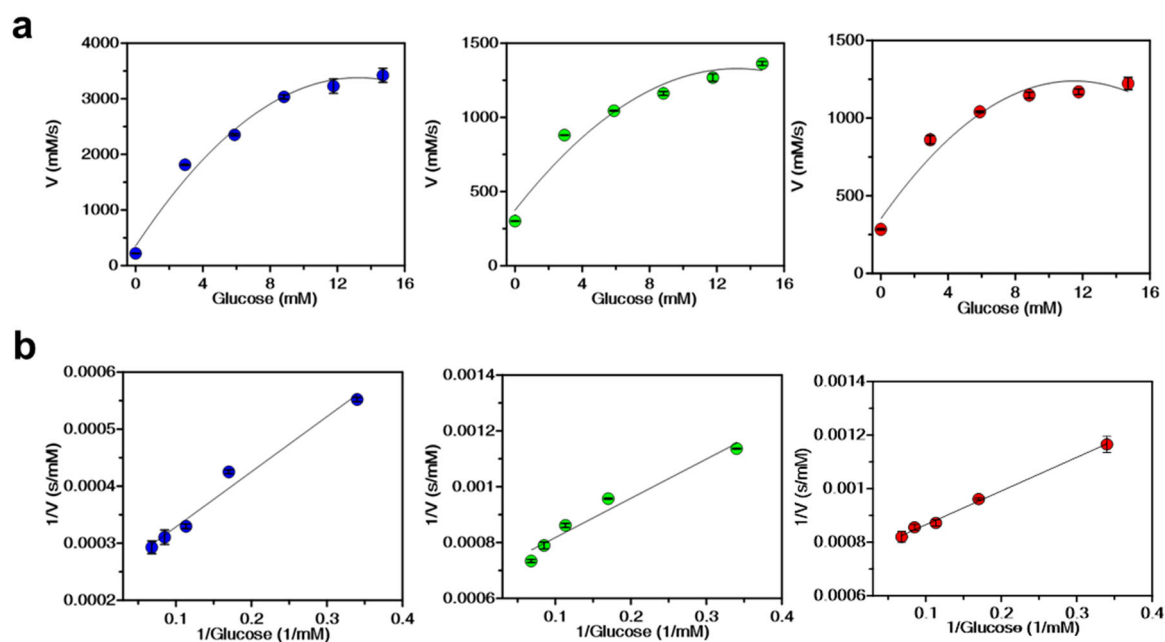

**Figure S3.** (a) Michaelis–Menten curves and (b) Lineweaver–Burk models for the generation of gluconic acid in the presence of free GOx (Blue dot), CGDSTC NSs+laser (Green dot), and CGDSTC NSs (Red dot).

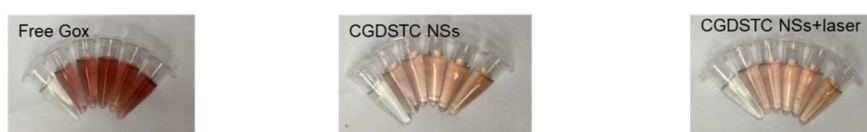

**Figure S4.** Photographs to show the generation of gluconic acid at different conditions.

**Table S1.** The  $V_{max}$  and  $K_m$  values at different conditions.

|                             | $V_{max}$ (mM/s) | $K_m$ (mM) |
|-----------------------------|------------------|------------|
| Free Gox without laser      | 4311.2           | 4.17       |
| Ce6-Gox-MXene with laser    | 1476.3           | 2.07       |
| Ce6-Gox-MXene without laser | 1351.9           | 1.7        |
